# Supplementary material
Source: MDPI journal article supplement (https://www.mdpi.com/2073-4441/15/20/3536)
Supplement: s1 [file s1]

**Table S1.** Fish sampling results separated by river and sample section.

| River         | Section    | Genus              | Species            | N          | River     | Section    | Genus              | Species            | N          |
|---------------|------------|--------------------|--------------------|------------|-----------|------------|--------------------|--------------------|------------|
| Tygart Valley | Discharge  | <i>Cyprinella</i>  | <i>spiloptera</i>  | 23         | West Fork | Discharge  | <i>Etheostoma</i>  | <i>blennioides</i> | 1          |
|               |            | <i>Lepomis</i>     | <i>cyanellus</i>   | 2          |           |            |                    | <i>flabellare</i>  | 1          |
|               |            |                    | <i>gibbosus</i>    | 26         |           |            |                    | <i>nigrum</i>      | 8          |
|               |            |                    | <i>macrochirus</i> | 16         |           |            | <i>Lepomis</i>     | <i>gibbosus</i>    | 1          |
|               |            |                    | <i>megalotis</i>   | 1          |           |            |                    | <i>macrochirus</i> | 17         |
|               |            | <i>Micropterus</i> | <i>salmoides</i>   | 1          |           |            | <i>Micropterus</i> | <i>salmoides</i>   | 1          |
|               |            | <i>Notemignous</i> | <i>crysoleucas</i> | 21         |           |            | <i>Notemignous</i> | <i>crysoleucas</i> | 43         |
|               |            | <i>Notropis</i>    | <i>stramineus</i>  | 6          |           |            | <i>Pimephales</i>  | <i>notatus</i>     | 49         |
|               |            | <i>Pimephales</i>  | <i>notatus</i>     | 22         |           |            |                    | <b>Total</b>       | <b>121</b> |
|               |            |                    | <b>Total</b>       | <b>118</b> |           | Downstream | <i>Etheostoma</i>  | <i>nigrum</i>      | 1          |
|               | Downstream | <i>Lepomis</i>     | <i>cyanellus</i>   | 3          |           |            | <i>Lepomis</i>     | <i>cyanellus</i>   | 13         |
|               |            |                    | <i>gibbosus</i>    | 19         |           |            |                    | <i>gibbosus</i>    | 2          |
|               |            |                    | <i>macrochirus</i> | 77         |           |            |                    | <i>macrochirus</i> | 36         |
|               |            | <i>Micropterus</i> | <i>dolomieu</i>    | 2          |           |            | <i>Micropterus</i> | <i>salmoides</i>   | 20         |
|               |            |                    | <i>salmoides</i>   | 1          |           |            | <i>Pimephales</i>  | <i>notatus</i>     | 68         |
|               |            | <i>Notemignous</i> | <i>crysoleucas</i> | 46         |           |            |                    | <b>Total</b>       | <b>140</b> |
|               |            | <i>Notropis</i>    | <i>stramineus</i>  | 78         |           | Upstream   | <i>Cyprinella</i>  | <i>spiloptera</i>  | 7          |
|               |            | <i>Pimephales</i>  | <i>notatus</i>     | 29         |           |            | <i>Etheostoma</i>  | <i>blennioides</i> | 2          |
|               |            |                    | <b>Total</b>       | <b>255</b> |           |            |                    | <i>nigrum</i>      | 2          |
|               | Upstream   | <i>Cyprinella</i>  | <i>spiloptera</i>  | 35         |           |            | <i>Lepomis</i>     | <i>cyanellus</i>   | 11         |
|               |            | <i>Lepomis</i>     | <i>cyanellus</i>   | 2          |           |            |                    | <i>gibbosus</i>    | 1          |
|               |            |                    | <i>gibbosus</i>    | 44         |           |            |                    | <i>macrochirus</i> | 14         |
|               |            |                    | <i>macrochirus</i> | 46         |           |            | <i>Micropterus</i> | <i>dolomieu</i>    | 14         |
|               |            |                    | <i>megalotis</i>   | 1          |           |            |                    | <i>salmoides</i>   | 1          |
|               |            | <i>Notemignous</i> | <i>crysoleucas</i> | 49         |           |            | <i>Pimephales</i>  | <i>notatus</i>     | 93         |
|               |            | <i>Notropis</i>    | <i>stramineus</i>  | 10         |           |            |                    | <b>Total</b>       | <b>145</b> |
|               |            | <i>Pimephales</i>  | <i>notatus</i>     | 52         |           |            |                    |                    |            |
|               |            |                    | <b>Total</b>       | <b>239</b> |           |            |                    |                    |            |

**Table S2.** Tukey HSD post hoc comparisons of differences in  $W_r$  based on genus.

| Genus Comparisons       | Difference | Lower   | Upper   | P-value adj |
|-------------------------|------------|---------|---------|-------------|
| Etheostoma–Cyprinella   | 3.868      | -7.289  | 15.025  | 0.948       |
| Lepomis–Cyprinella      | 5.713      | 0.430   | 10.996  | 0.024 *     |
| Micropterus–Cyprinella  | 17.681     | 9.854   | 25.509  | <0.001 ***  |
| Notemignous–Cyprinella  | -0.385     | -6.119  | 5.349   | 1.000       |
| Notropis–Cyprinella     | 9.171      | 2.887   | 15.454  | <0.001 ***  |
| Pimephales–Cyprinella   | 23.761     | 18.452  | 29.070  | <0.001 ***  |
| Lepomis–Etheostoma      | 1.845      | -8.436  | 12.126  | 0.998       |
| Micropterus–Etheostoma  | 13.814     | 2.021   | 25.606  | 0.010 *     |
| Notemignous–Etheostoma  | -4.253     | -14.773 | 6.268   | 0.896       |
| Notropis–Etheostoma     | 5.303      | -5.527  | 16.132  | 0.776       |
| Pimephales–Etheostoma   | 19.893     | 9.599   | 30.188  | <0.001 ***  |
| Micropterus–Lepomis     | 11.969     | 5.450   | 18.487  | <0.001 ***  |
| Notemignous–Lepomis     | -6.097     | -9.854  | -2.341  | <0.001 ***  |
| Notropis–Lepomis        | 3.458      | -1.093  | 8.008   | 0.273       |
| Pimephales–Lepomis      | 18.048     | 14.980  | 21.117  | <0.001 ***  |
| Notemignous–Micropterus | -18.066    | -24.956 | -11.177 | <0.001 ***  |
| Notropis–Micropterus    | -8.511     | -15.864 | -1.158  | 0.012 *     |

|                        |        |        |        |        |     |
|------------------------|--------|--------|--------|--------|-----|
| Pimephales–Micropterus | 6.080  | -0.460 | 12.620 | 0.088  | .   |
| Notropis–Notemignous   | 9.555  | 4.488  | 14.623 | <0.001 | *** |
| Pimephales–Notemignous | 24.146 | 20.353 | 27.939 | <0.001 | *** |
| Pimephales–Notropis    | 14.591 | 10.010 | 19.172 | <0.001 | *** |

**Table S3.** Tukey HSD post hoc comparison of differences in Wr based on the ‘section:genus’ interaction term.

| Section:Genus Comparisons                   | Wr Difference | Lower   | Upper  | P-value adj |     |
|---------------------------------------------|---------------|---------|--------|-------------|-----|
| Discharge:Cyprinella–Upstream:Cyprinella    | -0.225        | -12.464 | 12.014 | 1.000       |     |
| Upstream:Etheostoma–Upstream:Cyprinella     | 10.467        | -14.222 | 35.156 | 0.996       |     |
| Discharge:Etheostoma–Upstream:Cyprinella    | -0.695        | -17.297 | 15.907 | 1.000       |     |
| Downstream:Etheostoma–Upstream:Cyprinella   | 24.991        | -22.750 | 72.732 | 0.954       |     |
| Upstream:Lepomis–Upstream:Cyprinella        | 5.535         | -2.934  | 14.003 | 0.730       |     |
| Discharge:Lepomis–Upstream:Cyprinella       | 7.134         | -2.264  | 16.533 | 0.440       |     |
| Downstream:Lepomis–Upstream:Cyprinella      | 5.114         | -3.123  | 13.351 | 0.807       |     |
| Upstream:Micropterus–Upstream:Cyprinella    | 12.829        | -1.363  | 27.021 | 0.139       |     |
| Discharge:Micropterus–Upstream:Cyprinella   | 16.546        | -17.602 | 50.694 | 0.979       |     |
| Downstream:Micropterus–Upstream:Cyprinella  | 20.740        | 8.501   | 32.979 | <0.001      | *** |
| Upstream:Notemignous–Upstream:Cyprinella    | -4.358        | -14.280 | 5.563  | 0.993       |     |
| Discharge:Notemignous–Upstream:Cyprinella   | -0.011        | -9.381  | 9.358  | 1.000       |     |
| Downstream:Notemignous–Upstream:Cyprinella  | 3.408         | -6.662  | 13.477 | 1.000       |     |
| Upstream:Notropis–Upstream:Cyprinella       | 24.805        | 8.203   | 41.407 | <0.001      | *** |
| Discharge:Notropis–Upstream:Cyprinella      | 39.026        | 18.434  | 59.618 | <0.001      | *** |
| Downstream:Notropis–Upstream:Cyprinella     | 4.815         | -4.215  | 13.845 | 0.945       |     |
| Upstream:Pimephales–Upstream:Cyprinella     | 21.183        | 12.915  | 29.451 | <0.001      | *** |
| Discharge:Pimephales–Upstream:Cyprinella    | 27.175        | 17.990  | 36.359 | <0.001      | *** |
| Downstream:Pimephales–Upstream:Cyprinella   | 24.865        | 16.150  | 33.580 | <0.001      | *** |
| Upstream:Etheostoma–Discharge:Cyprinella    | 10.692        | -14.868 | 36.252 | 0.996       |     |
| Discharge:Etheostoma–Discharge:Cyprinella   | -0.470        | -18.342 | 17.402 | 1.000       |     |
| Downstream:Etheostoma–Discharge:Cyprinella  | 25.216        | -22.981 | 73.413 | 0.954       |     |
| Upstream:Lepomis–Discharge:Cyprinella       | 5.760         | -4.987  | 16.506 | 0.942       |     |
| Discharge:Lepomis–Discharge:Cyprinella      | 7.359         | -4.135  | 18.854 | 0.763       |     |
| Downstream:Lepomis–Discharge:Cyprinella     | 5.339         | -5.227  | 15.904 | 0.968       |     |
| Upstream:Micropterus–Discharge:Cyprinella   | 13.054        | -2.605  | 28.713 | 0.259       |     |
| Discharge:Micropterus–Discharge:Cyprinella  | 16.771        | -18.012 | 51.554 | 0.980       |     |
| Downstream:Micropterus–Discharge:Cyprinella | 20.965        | 7.051   | 34.878 | <0.001      | *** |
| Upstream:Notemignous–Discharge:Cyprinella   | -4.133        | -16.059 | 7.792  | 1.000       |     |
| Discharge:Notemignous–Discharge:Cyprinella  | 0.214         | -11.257 | 11.684 | 1.000       |     |
| Downstream:Notemignous–Discharge:Cyprinella | 3.632         | -8.417  | 15.682 | 1.000       |     |
| Upstream:Notropis–Discharge:Cyprinella      | 25.030        | 7.158   | 42.902 | <0.001      | *** |
| Discharge:Notropis–Discharge:Cyprinella     | 39.251        | 17.622  | 60.880 | <0.001      | *** |
| Downstream:Notropis–Discharge:Cyprinella    | 5.040         | -6.155  | 16.235 | 0.991       |     |
| Upstream:Pimephales–Discharge:Cyprinella    | 21.408        | 10.818  | 31.998 | <0.001      | *** |
| Discharge:Pimephales–Discharge:Cyprinella   | 27.399        | 16.079  | 38.720 | <0.001      | *** |
| Downstream:Pimephales–Discharge:Cyprinella  | 25.090        | 14.147  | 36.032 | <0.001      | *** |
| Discharge:Etheostoma–Upstream:Etheostoma    | -11.162       | -39.075 | 16.751 | 0.998       |     |
| Downstream:Etheostoma–Upstream:Etheostoma   | 14.524        | -38.227 | 67.275 | 1.000       |     |
| Upstream:Lepomis–Upstream:Etheostoma        | -4.932        | -28.917 | 19.052 | 1.000       |     |
| Discharge:Lepomis–Upstream:Etheostoma       | -3.333        | -27.661 | 20.996 | 1.000       |     |
| Downstream:Lepomis–Upstream:Etheostoma      | -5.353        | -29.257 | 18.550 | 1.000       |     |

|                                              |         |         |        |        |     |
|----------------------------------------------|---------|---------|--------|--------|-----|
| Upstream:Micropterus–Upstream:Etheostoma     | 2.362   | -24.189 | 28.913 | 1.000  |     |
| Discharge:Micropterus–Upstream:Etheostoma    | 6.079   | -34.782 | 46.940 | 1.000  |     |
| Downstream:Micropterus–Upstream:Etheostoma   | 10.273  | -15.288 | 35.833 | 0.998  |     |
| Upstream:Notemignous–Upstream:Etheostoma     | -14.825 | -39.360 | 9.710  | 0.841  |     |
| Discharge:Notemignous–Upstream:Etheostoma    | -10.478 | -34.795 | 13.839 | 0.995  |     |
| Downstream:Notemignous–Upstream:Etheostoma   | -7.060  | -31.655 | 17.536 | 1.000  |     |
| Upstream:Notropis–Upstream:Etheostoma        | 14.338  | -13.575 | 42.251 | 0.962  |     |
| Discharge:Notropis–Upstream:Etheostoma       | 28.559  | -1.897  | 59.015 | 0.099  | .   |
| Downstream:Notropis–Upstream:Etheostoma      | -5.652  | -29.841 | 18.536 | 1.000  |     |
| Upstream:Pimephales–Upstream:Etheostoma      | 10.716  | -13.198 | 34.630 | 0.992  |     |
| Discharge:Pimephales–Upstream:Etheostoma     | 16.707  | -7.539  | 40.954 | 0.635  |     |
| Downstream:Pimephales–Upstream:Etheostoma    | 14.398  | -9.675  | 38.470 | 0.853  |     |
| Downstream:Etheostoma–Discharge:Etheostoma   | 25.686  | -23.799 | 75.171 | 0.958  |     |
| Upstream:Lepomis–Discharge:Etheostoma        | 6.230   | -9.305  | 21.764 | 0.998  |     |
| Discharge:Lepomis–Discharge:Etheostoma       | 7.829   | -8.232  | 23.890 | 0.978  |     |
| Downstream:Lepomis–Discharge:Etheostoma      | 5.809   | -9.601  | 21.218 | 0.999  |     |
| Upstream:Micropterus–Discharge:Etheostoma    | 13.524  | -5.738  | 32.786 | 0.599  |     |
| Discharge:Micropterus–Discharge:Etheostoma   | 17.241  | -19.306 | 53.788 | 0.985  |     |
| Downstream:Micropterus–Discharge:Etheostoma  | 21.434  | 3.563   | 39.306 | 0.003  | **  |
| Upstream:Notemignous–Discharge:Etheostoma    | -3.663  | -20.036 | 12.709 | 1.000  |     |
| Discharge:Notemignous–Discharge:Etheostoma   | 0.684   | -15.360 | 16.727 | 1.000  |     |
| Downstream:Notemignous–Discharge:Etheostoma  | 4.102   | -12.360 | 20.565 | 1.000  |     |
| Upstream:Notropis–Discharge:Etheostoma       | 25.500  | 4.399   | 46.601 | 0.003  | **  |
| Discharge:Notropis–Discharge:Etheostoma      | 39.721  | 15.356  | 64.086 | <0.001 | *** |
| Downstream:Notropis–Discharge:Etheostoma     | 5.510   | -10.338 | 21.358 | 1.000  |     |
| Upstream:Pimephales–Discharge:Etheostoma     | 21.878  | 6.452   | 37.304 | <0.001 | *** |
| Discharge:Pimephales–Discharge:Etheostoma    | 27.869  | 11.933  | 43.806 | <0.001 | *** |
| Downstream:Pimephales–Discharge:Etheostoma   | 25.560  | 9.889   | 41.230 | <0.001 | *** |
| Upstream:Lepomis–Downstream:Etheostoma       | -19.456 | -66.836 | 27.924 | 0.997  |     |
| Discharge:Lepomis–Downstream:Etheostoma      | -17.857 | -65.412 | 29.699 | 0.999  |     |
| Downstream:Lepomis–Downstream:Etheostoma     | -19.877 | -67.216 | 27.462 | 0.996  |     |
| Upstream:Micropterus–Downstream:Etheostoma   | -12.162 | -60.891 | 36.568 | 1.000  |     |
| Discharge:Micropterus–Downstream:Etheostoma  | -8.445  | -66.231 | 49.342 | 1.000  |     |
| Downstream:Micropterus–Downstream:Etheostoma | -4.251  | -52.448 | 43.946 | 1.000  |     |
| Upstream:Notemignous–Downstream:Etheostoma   | -29.349 | -77.010 | 18.312 | 0.818  |     |
| Discharge:Notemignous–Downstream:Etheostoma  | -25.002 | -72.552 | 22.547 | 0.952  |     |
| Downstream:Notemignous–Downstream:Etheostoma | -21.583 | -69.276 | 26.109 | 0.991  |     |
| Upstream:Notropis–Downstream:Etheostoma      | -0.186  | -49.671 | 49.299 | 1.000  |     |
| Discharge:Notropis–Downstream:Etheostoma     | 14.035  | -36.927 | 64.998 | 1.000  |     |
| Downstream:Notropis–Downstream:Etheostoma    | -20.176 | -67.660 | 27.308 | 0.996  |     |
| Upstream:Pimephales–Downstream:Etheostoma    | -3.808  | -51.152 | 43.537 | 1.000  |     |
| Discharge:Pimephales–Downstream:Etheostoma   | 2.184   | -45.330 | 49.697 | 1.000  |     |
| Downstream:Pimephales–Downstream:Etheostoma  | -0.126  | -47.551 | 47.299 | 1.000  |     |
| Discharge:Lepomis–Upstream:Lepomis           | 1.600   | -5.752  | 8.951  | 1.000  |     |
| Downstream:Lepomis–Upstream:Lepomis          | -0.421  | -6.213  | 5.371  | 1.000  |     |
| Upstream:Micropterus–Upstream:Lepomis        | 7.295   | -5.633  | 20.222 | 0.908  |     |
| Discharge:Micropterus–Upstream:Lepomis       | 11.012  | -22.630 | 44.654 | 1.000  |     |
| Downstream:Micropterus–Upstream:Lepomis      | 15.205  | 4.458   | 25.952 | <0.001 | *** |
| Upstream:Notemignous–Upstream:Lepomis        | -9.893  | -17.902 | -1.884 | 0.002  | **  |
| Discharge:Notemignous–Upstream:Lepomis       | -5.546  | -12.860 | 1.768  | 0.442  |     |

|                                              |         |         |        |        |     |
|----------------------------------------------|---------|---------|--------|--------|-----|
| Downstream:Notemignous–Upstream:Lepomis      | -2.127  | -10.319 | 6.064  | 1.000  |     |
| Upstream:Notropis–Upstream:Lepomis           | 19.270  | 3.736   | 34.805 | 0.002  | **  |
| Discharge:Notropis–Upstream:Lepomis          | 33.492  | 13.750  | 53.233 | <0.001 | *** |
| Downstream:Notropis–Upstream:Lepomis         | -0.720  | -7.593  | 6.154  | 1.000  |     |
| Upstream:Pimephales–Upstream:Lepomis         | 15.649  | 9.812   | 21.485 | <0.001 | *** |
| Discharge:Pimephales–Upstream:Lepomis        | 21.640  | 14.565  | 28.715 | <0.001 | *** |
| Downstream:Pimephales–Upstream:Lepomis       | 19.330  | 12.876  | 25.784 | <0.001 | *** |
| Downstream:Lepomis–Discharge:Lepomis         | -2.021  | -9.104  | 5.063  | 1.000  |     |
| Upstream:Micropterus–Discharge:Lepomis       | 5.695   | -7.861  | 19.250 | 0.996  |     |
| Discharge:Micropterus–Discharge:Lepomis      | 9.412   | -24.476 | 43.300 | 1.000  |     |
| Downstream:Micropterus–Discharge:Lepomis     | 13.605  | 2.111   | 25.100 | 0.004  | **  |
| Upstream:Notemignous–Discharge:Lepomis       | -11.493 | -20.480 | -2.506 | 0.001  | **  |
| Discharge:Notemignous–Discharge:Lepomis      | -7.146  | -15.519 | 1.228  | 0.220  |     |
| Downstream:Notemignous–Discharge:Lepomis     | -3.727  | -12.877 | 5.424  | 0.997  |     |
| Upstream:Notropis–Discharge:Lepomis          | 17.671  | 1.610   | 33.732 | 0.014  | *   |
| Discharge:Notropis–Discharge:Lepomis         | 31.892  | 11.733  | 52.050 | <0.001 | *** |
| Downstream:Notropis–Discharge:Lepomis        | -2.319  | -10.312 | 5.673  | 1.000  |     |
| Upstream:Pimephales–Discharge:Lepomis        | 14.049  | 6.929   | 21.168 | <0.001 | *** |
| Discharge:Pimephales–Discharge:Lepomis       | 20.040  | 11.874  | 28.207 | <0.001 | *** |
| Downstream:Pimephales–Discharge:Lepomis      | 17.730  | 10.096  | 25.365 | <0.001 | *** |
| Upstream:Micropterus–Downstream:Lepomis      | 7.715   | -5.062  | 20.492 | 0.842  |     |
| Discharge:Micropterus–Downstream:Lepomis     | 11.432  | -22.152 | 45.017 | 1.000  |     |
| Downstream:Micropterus–Downstream:Lepomis    | 15.626  | 5.060   | 26.191 | <0.001 | *** |
| Upstream:Notemignous–Downstream:Lepomis      | -9.472  | -17.236 | -1.709 | 0.003  | **  |
| Discharge:Notemignous–Downstream:Lepomis     | -5.125  | -12.170 | 1.919  | 0.527  |     |
| Downstream:Notemignous–Downstream:Lepomis    | -1.706  | -9.659  | 6.246  | 1.000  |     |
| Upstream:Notropis–Downstream:Lepomis         | 19.691  | 4.282   | 35.101 | 0.001  | **  |
| Discharge:Notropis–Downstream:Lepomis        | 33.912  | 14.269  | 53.556 | <0.001 | *** |
| Downstream:Notropis–Downstream:Lepomis       | -0.299  | -6.885  | 6.288  | 1.000  |     |
| Upstream:Pimephales–Downstream:Lepomis       | 16.069  | 10.574  | 21.564 | <0.001 | *** |
| Discharge:Pimephales–Downstream:Lepomis      | 22.061  | 15.264  | 28.857 | <0.001 | *** |
| Downstream:Pimephales–Downstream:Lepomis     | 19.751  | 13.603  | 25.898 | <0.001 | *** |
| Discharge:Micropterus–Upstream:Micropterus   | 3.717   | -31.800 | 39.235 | 1.000  |     |
| Downstream:Micropterus–Upstream:Micropterus  | 7.910   | -7.748  | 23.569 | 0.968  |     |
| Upstream:Notemignous–Upstream:Micropterus    | -17.187 | -31.110 | -3.265 | 0.002  | **  |
| Discharge:Notemignous–Upstream:Micropterus   | -12.840 | -26.375 | 0.695  | 0.088  | .   |
| Downstream:Notemignous–Upstream:Micropterus  | -9.422  | -23.450 | 4.607  | 0.683  |     |
| Upstream:Notropis–Upstream:Micropterus       | 11.976  | -7.286  | 31.238 | 0.805  |     |
| Discharge:Notropis–Upstream:Micropterus      | 26.197  | 3.406   | 48.988 | 0.007  | **  |
| Downstream:Notropis–Upstream:Micropterus     | -8.014  | -21.317 | 5.288  | 0.845  |     |
| Upstream:Pimephales–Upstream:Micropterus     | 8.354   | -4.443  | 21.151 | 0.732  |     |
| Discharge:Pimephales–Upstream:Micropterus    | 14.345  | 0.938   | 27.753 | 0.021  | *   |
| Downstream:Pimephales–Upstream:Micropterus   | 12.035  | -1.055  | 25.126 | 0.119  |     |
| Downstream:Micropterus–Discharge:Micropterus | 4.193   | -30.590 | 38.976 | 1.000  |     |
| Upstream:Notemignous–Discharge:Micropterus   | -20.905 | -54.942 | 13.132 | 0.821  |     |
| Discharge:Notemignous–Discharge:Micropterus  | -16.558 | -50.438 | 17.323 | 0.977  |     |
| Downstream:Notemignous–Discharge:Micropterus | -13.139 | -47.219 | 20.942 | 0.999  |     |
| Upstream:Notropis–Discharge:Micropterus      | 8.259   | -28.288 | 44.806 | 1.000  |     |
| Discharge:Notropis–Discharge:Micropterus     | 22.480  | -16.044 | 61.004 | 0.879  |     |
| Downstream:Notropis–Discharge:Micropterus    | -11.731 | -45.519 | 22.056 | 1.000  |     |

|                                               |         |         |         |        |     |
|-----------------------------------------------|---------|---------|---------|--------|-----|
| Upstream:Pimephales–Discharge:Micropterus     | 4.637   | -28.955 | 38.229  | 1.000  |     |
| Discharge:Pimephales–Discharge:Micropterus    | 10.628  | -23.201 | 44.458  | 1.000  |     |
| Downstream:Pimephales–Discharge:Micropterus   | 8.318   | -25.387 | 42.023  | 1.000  |     |
| Upstream:Notemignous–Downstream:Micropterus   | -25.098 | -37.024 | -13.172 | <0.001 | *** |
| Discharge:Notemignous–Downstream:Micropterus  | -20.751 | -32.221 | -9.280  | <0.001 | *** |
| Downstream:Notemignous–Downstream:Micropterus | -17.332 | -29.381 | -5.283  | <0.001 | *** |
| Upstream:Notropis–Downstream:Micropterus      | 4.065   | -13.806 | 21.937  | 1.000  |     |
| Discharge:Notropis–Downstream:Micropterus     | 18.287  | -3.342  | 39.916  | 0.235  |     |
| Downstream:Notropis–Downstream:Micropterus    | -15.925 | -27.120 | -4.730  | <0.001 | *** |
| Upstream:Pimephales–Downstream:Micropterus    | 0.444   | -10.146 | 11.033  | 1.000  |     |
| Discharge:Pimephales–Downstream:Micropterus   | 6.435   | -4.885  | 17.755  | 0.902  |     |
| Downstream:Pimephales–Downstream:Micropterus  | 4.125   | -6.818  | 15.068  | 0.999  |     |
| Discharge:Notemignous–Upstream:Notemignous    | 4.347   | -4.609  | 13.303  | 0.979  |     |
| Downstream:Notemignous–Upstream:Notemignous   | 7.766   | -1.921  | 17.452  | 0.330  |     |
| Upstream:Notropis–Upstream:Notemignous        | 29.163  | 12.791  | 45.536  | <0.001 | *** |
| Discharge:Notropis–Upstream:Notemignous       | 43.385  | 22.977  | 63.792  | <0.001 | *** |
| Downstream:Notropis–Upstream:Notemignous      | 9.173   | 0.572   | 17.774  | 0.022  | *   |
| Upstream:Pimephales–Upstream:Notemignous      | 25.541  | 17.745  | 33.338  | <0.001 | *** |
| Discharge:Pimephales–Upstream:Notemignous     | 31.533  | 22.770  | 40.296  | <0.001 | *** |
| Downstream:Pimephales–Upstream:Notemignous    | 29.223  | 20.954  | 37.492  | <0.001 | *** |
| Downstream:Notemignous–Discharge:Notemignous  | 3.419   | -5.702  | 12.539  | 0.999  |     |
| Upstream:Notropis–Discharge:Notemignous       | 24.816  | 8.773   | 40.860  | <0.001 | *** |
| Discharge:Notropis–Discharge:Notemignous      | 39.038  | 18.893  | 59.182  | <0.001 | *** |
| Downstream:Notropis–Discharge:Notemignous     | 4.826   | -3.131  | 12.784  | 0.837  |     |
| Upstream:Pimephales–Discharge:Notemignous     | 21.194  | 14.114  | 28.275  | <0.001 | *** |
| Discharge:Pimephales–Discharge:Notemignous    | 27.186  | 19.053  | 35.318  | <0.001 | *** |
| Downstream:Pimephales–Discharge:Notemignous   | 24.876  | 17.278  | 32.474  | <0.001 | *** |
| Upstream:Notropis–Downstream:Notemignous      | 21.398  | 4.935   | 37.860  | 0.001  | **  |
| Discharge:Notropis–Downstream:Notemignous     | 35.619  | 15.139  | 56.099  | <0.001 | *** |
| Downstream:Notropis–Downstream:Notemignous    | 1.407   | -7.364  | 10.179  | 1.000  |     |
| Upstream:Pimephales–Downstream:Notemignous    | 17.776  | 9.791   | 25.760  | <0.001 | *** |
| Discharge:Pimephales–Downstream:Notemignous   | 23.767  | 14.837  | 32.697  | <0.001 | *** |
| Downstream:Pimephales–Downstream:Notemignous  | 21.457  | 13.011  | 29.904  | <0.001 | *** |
| Discharge:Notropis–Upstream:Notropis          | 14.221  | -10.144 | 38.586  | 0.879  |     |
| Downstream:Notropis–Upstream:Notropis         | -19.990 | -35.838 | -4.142  | 0.001  | **  |
| Upstream:Pimephales–Upstream:Notropis         | -3.622  | -19.048 | 11.804  | 1.000  |     |
| Discharge:Pimephales–Upstream:Notropis        | 2.369   | -13.567 | 18.306  | 1.000  |     |
| Downstream:Pimephales–Upstream:Notropis       | 0.060   | -15.611 | 15.730  | 1.000  |     |
| Downstream:Notropis–Discharge:Notropis        | -34.211 | -54.201 | -14.222 | <0.001 | *** |
| Upstream:Pimephales–Discharge:Notropis        | -17.843 | -37.500 | 1.813   | 0.134  |     |
| Discharge:Pimephales–Discharge:Notropis       | -11.852 | -31.911 | 8.208   | 0.866  |     |
| Downstream:Pimephales–Discharge:Notropis      | -14.162 | -34.011 | 5.687   | 0.567  |     |
| Upstream:Pimephales–Downstream:Notropis       | 16.368  | 9.743   | 22.993  | <0.001 | *** |
| Discharge:Pimephales–Downstream:Notropis      | 22.360  | 14.620  | 30.099  | <0.001 | *** |
| Downstream:Pimephales–Downstream:Notropis     | 20.050  | 12.874  | 27.225  | <0.001 | *** |
| Discharge:Pimephales–Upstream:Pimephales      | 5.991   | -0.843  | 12.826  | 0.179  |     |
| Downstream:Pimephales–Upstream:Pimephales     | 3.681   | -2.507  | 9.870   | 0.859  |     |
| Downstream:Pimephales–Discharge:Pimephales    | -2.310  | -9.679  | 5.059   | 1.000  |     |
